# Supplementary material for: Association between Cardiologist Consultation and Mortality of Stable Patients with Elevated Cardiac Troponin at Admission
Source: MDPI journal article supplement (doi:10.3390/diagnostics11122229), 2021-11-29
Supplement: s1 [file s1]

Supplemental Table S1. Department of hospitalization

|                           | Entire population          |                         | Propensity-score matched population |                         |
|---------------------------|----------------------------|-------------------------|-------------------------------------|-------------------------|
|                           | No cardiologist evaluation | Cardiologist evaluation | No cardiologist evaluation          | Cardiologist evaluation |
|                           | (N=932)                    | (N=397)                 | (N=560)                             | (N=324)                 |
| Dentist                   | 2 (0.2)                    | 1 (0.3)                 | 1 (0.2)                             | 1 (0.3)                 |
| Otolaryngology            | 11 (1.2)                   | 10 (2.5)                | 6 (1.1)                             | 9 (2.8)                 |
| Family medicine           | 1 (0.1)                    | 0                       | 1 (0.2)                             | 0                       |
| General surgery           | 246 (26.4)                 | 117 (29.5)              | 152 (27.1)                          | 90 (27.8)               |
| Gastroenterology          | 39 (4.2)                   | 19 (4.8)                | 21 (3.8)                            | 18 (5.6)                |
| Pulmonology               | 119 (12.8)                 | 42 (10.6)               | 69 (12.3)                           | 38 (11.7)               |
| Endocrinology             | 8 (0.9)                    | 9 (2.3)                 | 6 (1.1)                             | 5 (1.5)                 |
| Nephrology                | 63 (6.8)                   | 47 (11.8)               | 42 (7.5)                            | 22 (6.8)                |
| Hemato-oncology           | 78 (8.4)                   | 41 (10.3)               | 53 (9.5)                            | 38 (11.7)               |
| Infectious disease        | 35 (3.8)                   | 10 (2.5)                | 19 (3.4)                            | 9 (2.8)                 |
| Allergy                   | 6 (0.6)                    | 3 (0.8)                 | 2 (0.4)                             | 3 (0.9)                 |
| Rheumatology              | 6 (0.6)                    | 1 (0.3)                 | 5 (0.9)                             | 1 (0.3)                 |
| Neurology                 | 35 (3.8)                   | 7 (1.8)                 | 24 (4.3)                            | 5 (1.5)                 |
| Neurosurgery              | 80 (8.6)                   | 11 (2.8)                | 38 (6.8)                            | 11 (3.4)                |
| Obstetrics and Gynecology | 22 (2.4)                   | 3 (0.8)                 | 9 (1.6)                             | 3 (0.9)                 |
| Ophthalmology             | 1 (0.1)                    | 3 (0.8)                 | 1 (0.2)                             | 3 (0.9)                 |
| Orthopedics               | 75 (8.0)                   | 24 (6.0)                | 51 (9.1)                            | 23 (7.1)                |
| Pediatrics                | 30 (3.2)                   | 2 (0.5)                 | 13 (2.3)                            | 2 (0.6)                 |
| Plastic surgery           | 8 (0.9)                    | 0                       | 6 (1.1)                             | 0                       |
| Psychiatry                | 7 (0.8)                    | 2 (0.5)                 | 4 (0.7)                             | 2 (0.6)                 |
| Rehabilitation Medicine   | 33 (3.5)                   | 21 (5.3)                | 19 (3.4)                            | 18 (5.6)                |
| Health care center        | 0                          | 1 (0.3)                 | 0                                   | 1 (0.3)                 |
| Urology                   | 26 (2.8)                   | 23 (5.8)                | 18 (3.2)                            | 22 (6.8)                |
